# Supplementary material for: Enhanced efficiency in polymer solar cells via hydrogen plasma treatment of ZnO electron transport layers
Source: Royal Society of Chemistry journal article supplement (doi:10.1039/c4ta05541a), 2014-12-19
Supplement: c4ta05541a1.pdf [file c4ta05541a1.pdf]

## Electronic Supplementary Information (ESI)

### Enhanced efficiency in polymer solar cells via hydrogen plasma treatment of ZnO electron transport layers

*Hong Li Gao, Xing Wang Zhang,\* Jun Hua Meng, Zhi Gang Yin, Liu Qi Zhang, Jin Liang Wu and  
Xin Liu*

*Key Laboratory of Semiconductor Materials Science, Institute of Semiconductors, Chinese  
Academy of Sciences, Beijing 100083, P. R. China*

\* Email: [xwzhang@semi.ac.cn](mailto:xwzhang@semi.ac.cn)

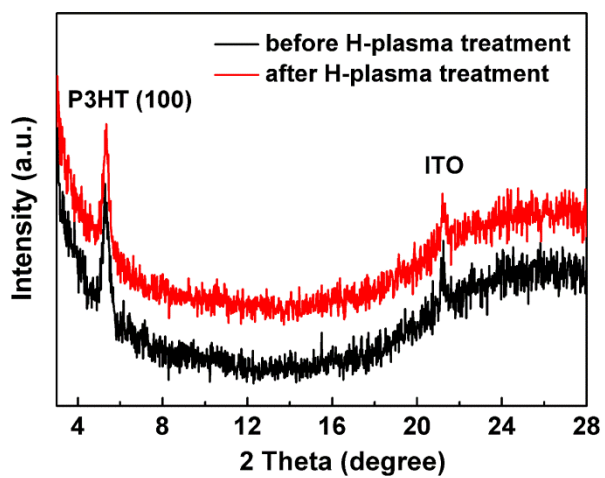

**Fig. S1** XRD patterns of ITO/PEDOT:PSS/P3HT:PCBM/ZnO film measured before and after H-plasma treatment for 5 min.

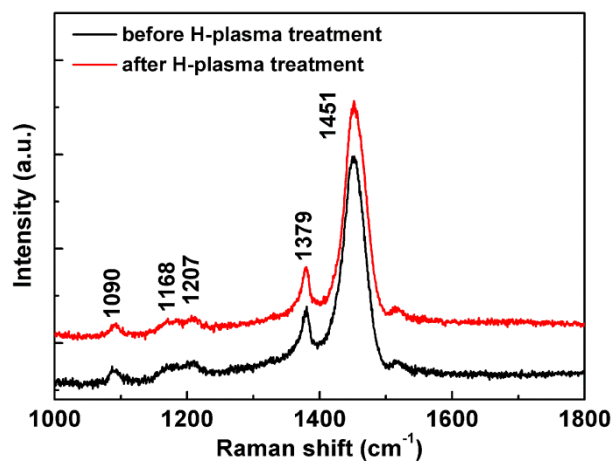

**Fig. S2** Raman spectra of Si/P3HT:PCBM/ZnO film measured before and after H-plasma treatment for 5 min.
